# Supplementary material for: The Tasmanian devil microbiome—implications for conservation and management
Source: PubMed Central journal article supplement (PMC4687321; doi:10.1186/s40168-015-0143-0), 2015-12-21

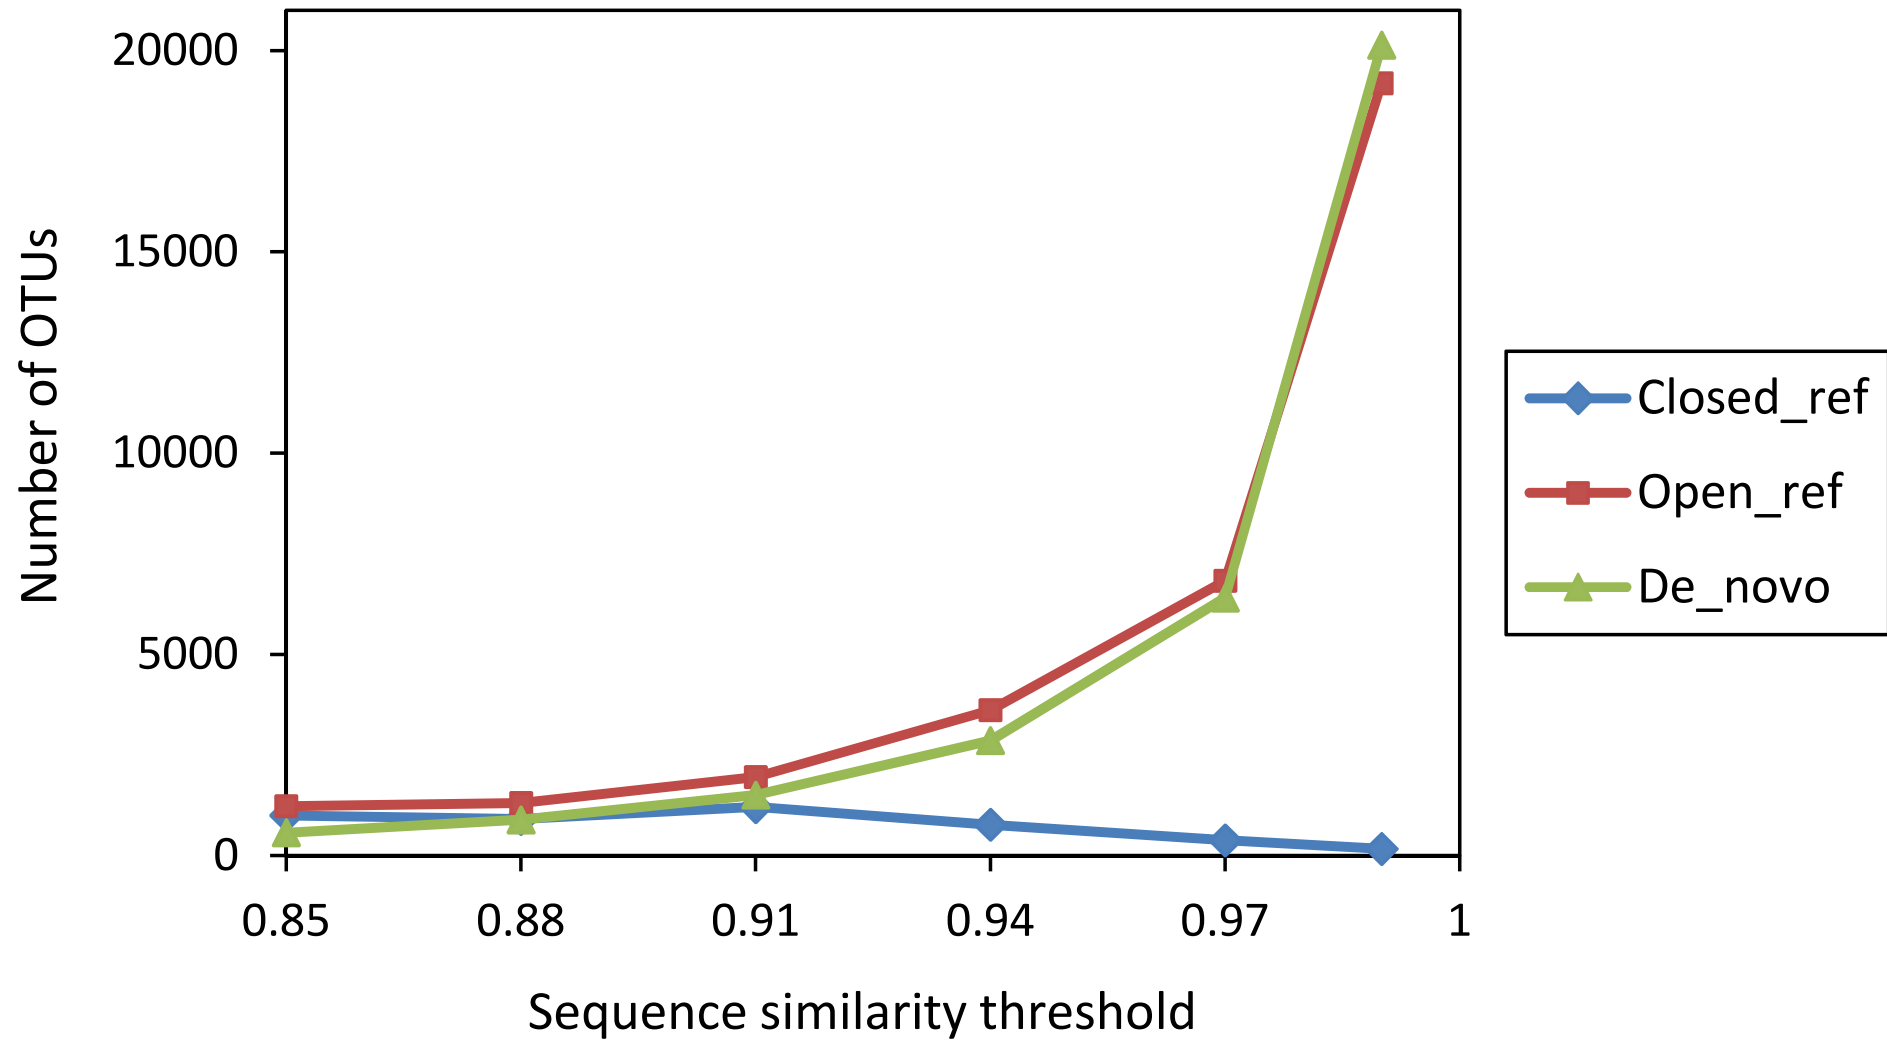

Supplement: 40168_2015_143_MOESM3_ESM.pdf [file 40168_2015_143_MOESM3_ESM.pdf]
