# Supplementary material for: The Tasmanian devil microbiome—implications for conservation and management
Source: PubMed Central journal article supplement (PMC4687321; doi:10.1186/s40168-015-0143-0), 2015-12-21
Supplement: 40168_2015_143_MOESM5_ESM.pdf [file 40168_2015_143_MOESM5_ESM.pdf]

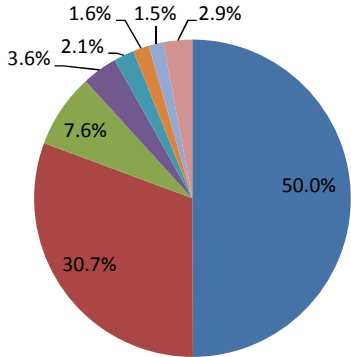

- Proteobacteria\_Gammaproteobacteria\_Pseudomonadales
- Fusobacteria\_Fusobacteriia\_Fusobacteriales
- Firmicutes\_Clostridia\_Clostridiales
- Proteobacteria\_Betaproteobacteria\_Neisseriales
- Bacteroidetes\_Bacteroidia\_Bacteroidales
- Bacteroidetes\_Flavobacteriia\_Flavobacteriales
- Proteobacteria\_Gammaproteobacteria\_Pasteurellales
- Other
