# Supplementary material for: The Tasmanian devil microbiome—implications for conservation and management
Source: PubMed Central journal article supplement (PMC4687321; doi:10.1186/s40168-015-0143-0), 2015-12-21
Supplement: 40168_2015_143_MOESM6_ESM.pdf [file 40168_2015_143_MOESM6_ESM.pdf]

Additional file. Comparison of Tasmanian devil microbiota between different geographic sites

(a) Pair-wise unweighted UniFrac distances between sample groups.

(b) PCoA analysis of unweighted UniFrac distances.

Page 2 - gut

Page 3 - skin

Page 4 - pouch

Page 5 - oral

**a**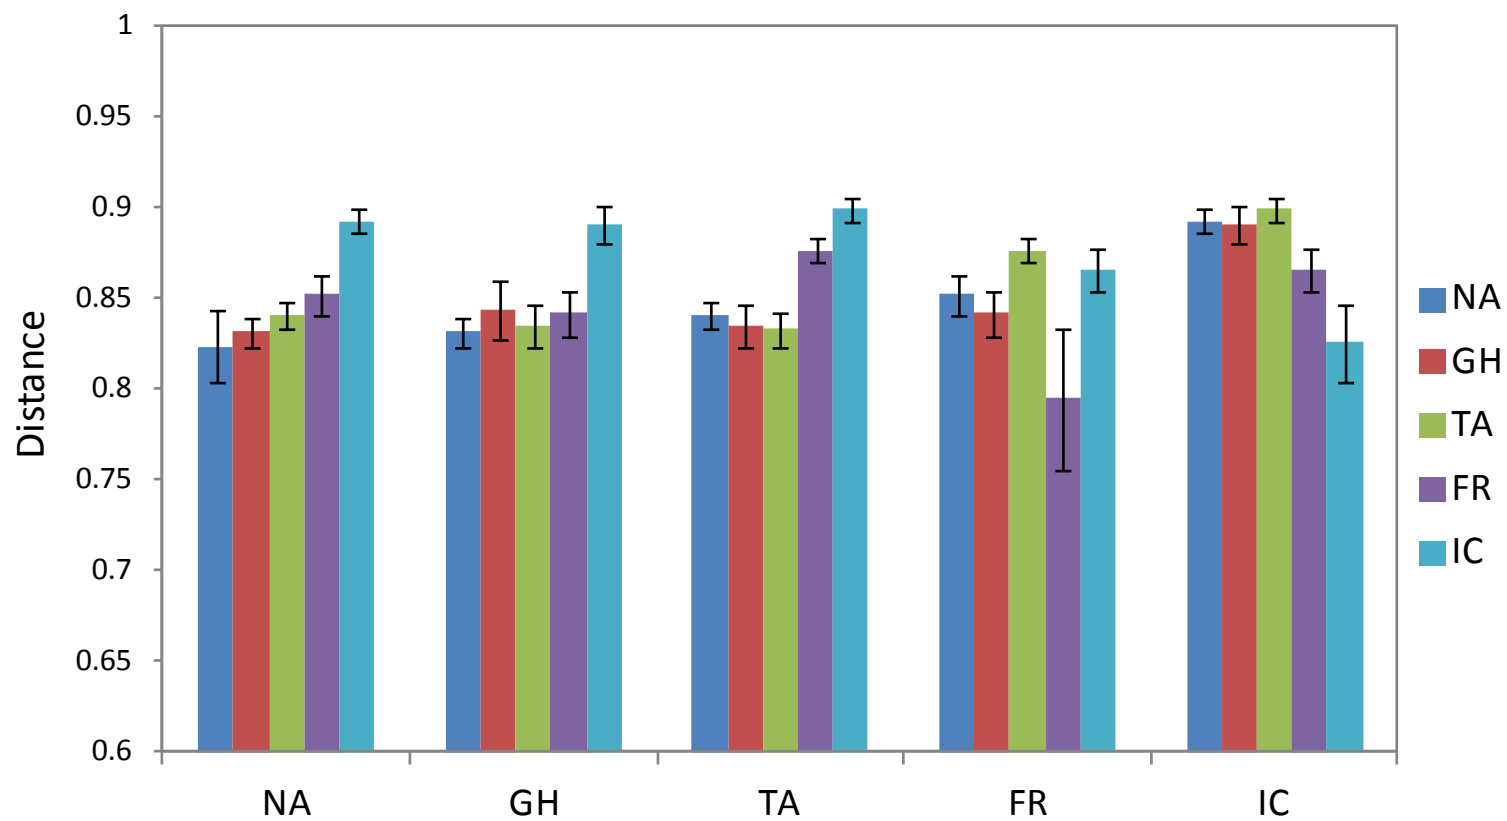**b**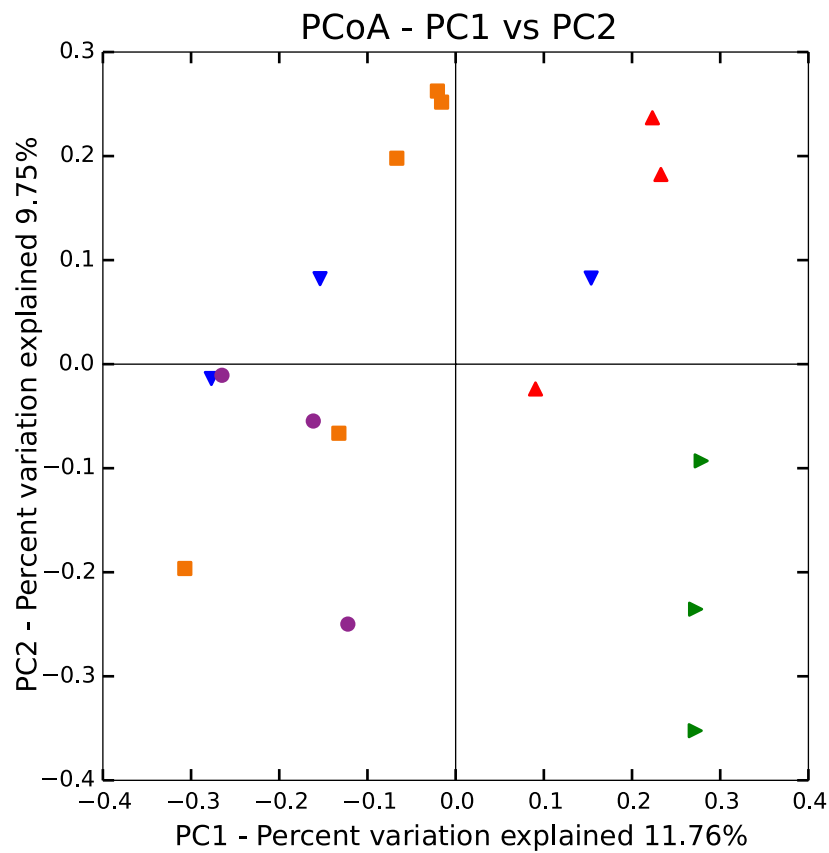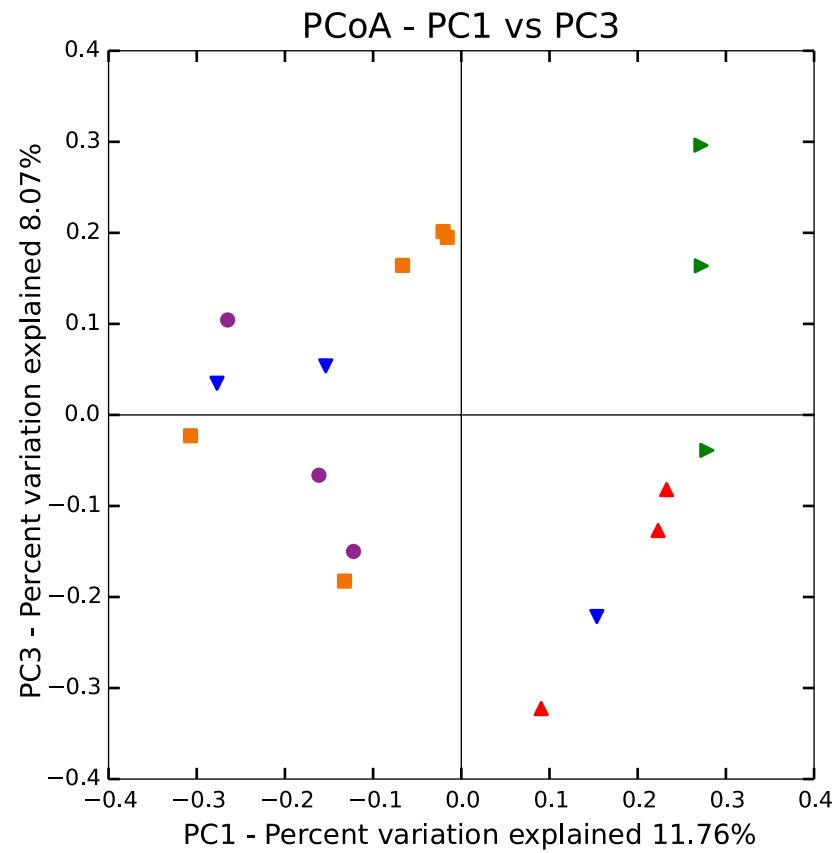

▼ GH    ■ NA    ● TA    ▲ DA    ► RP

**a**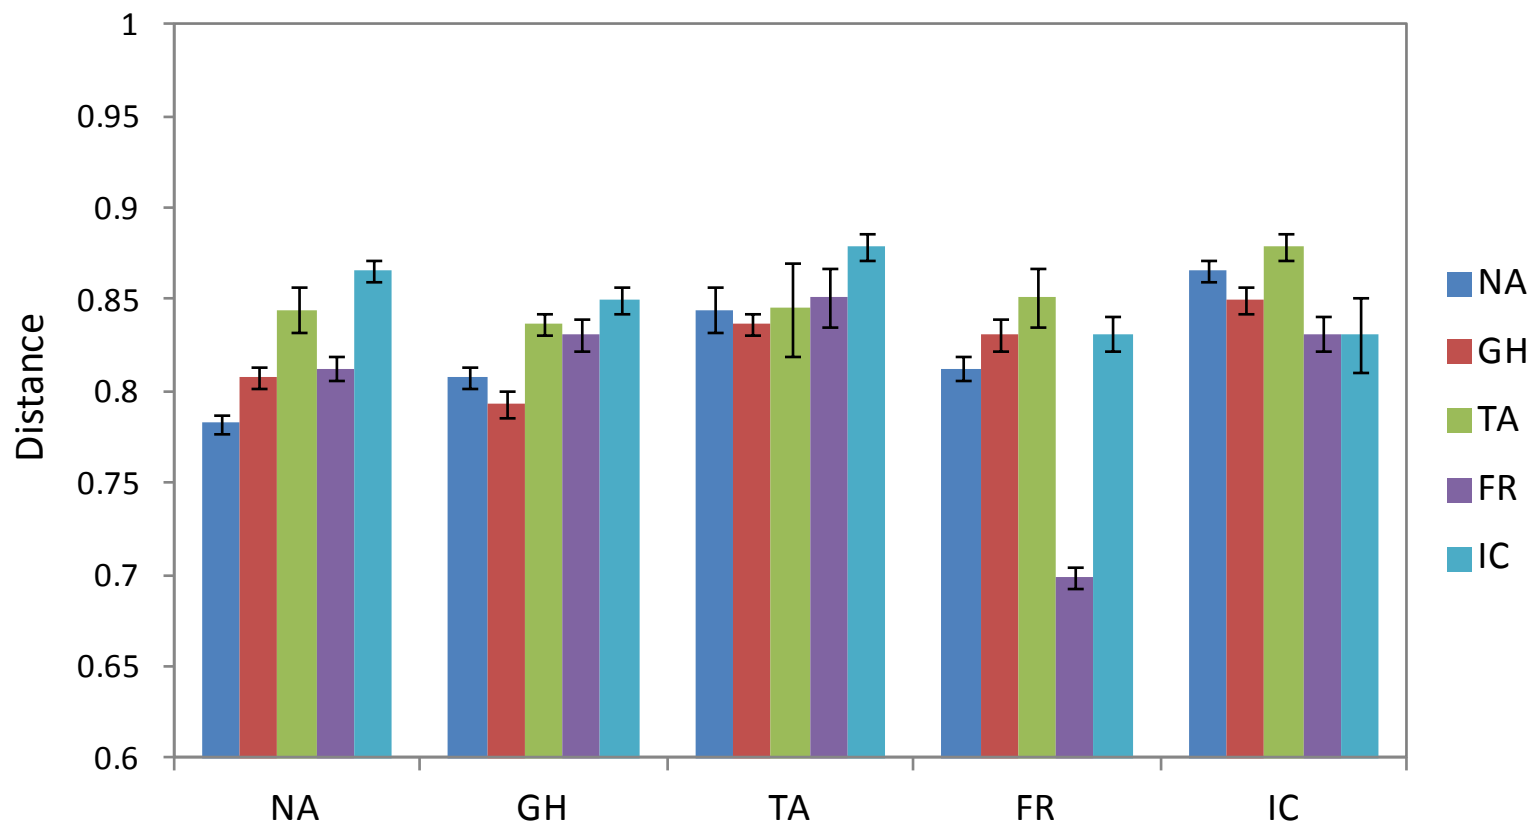**b**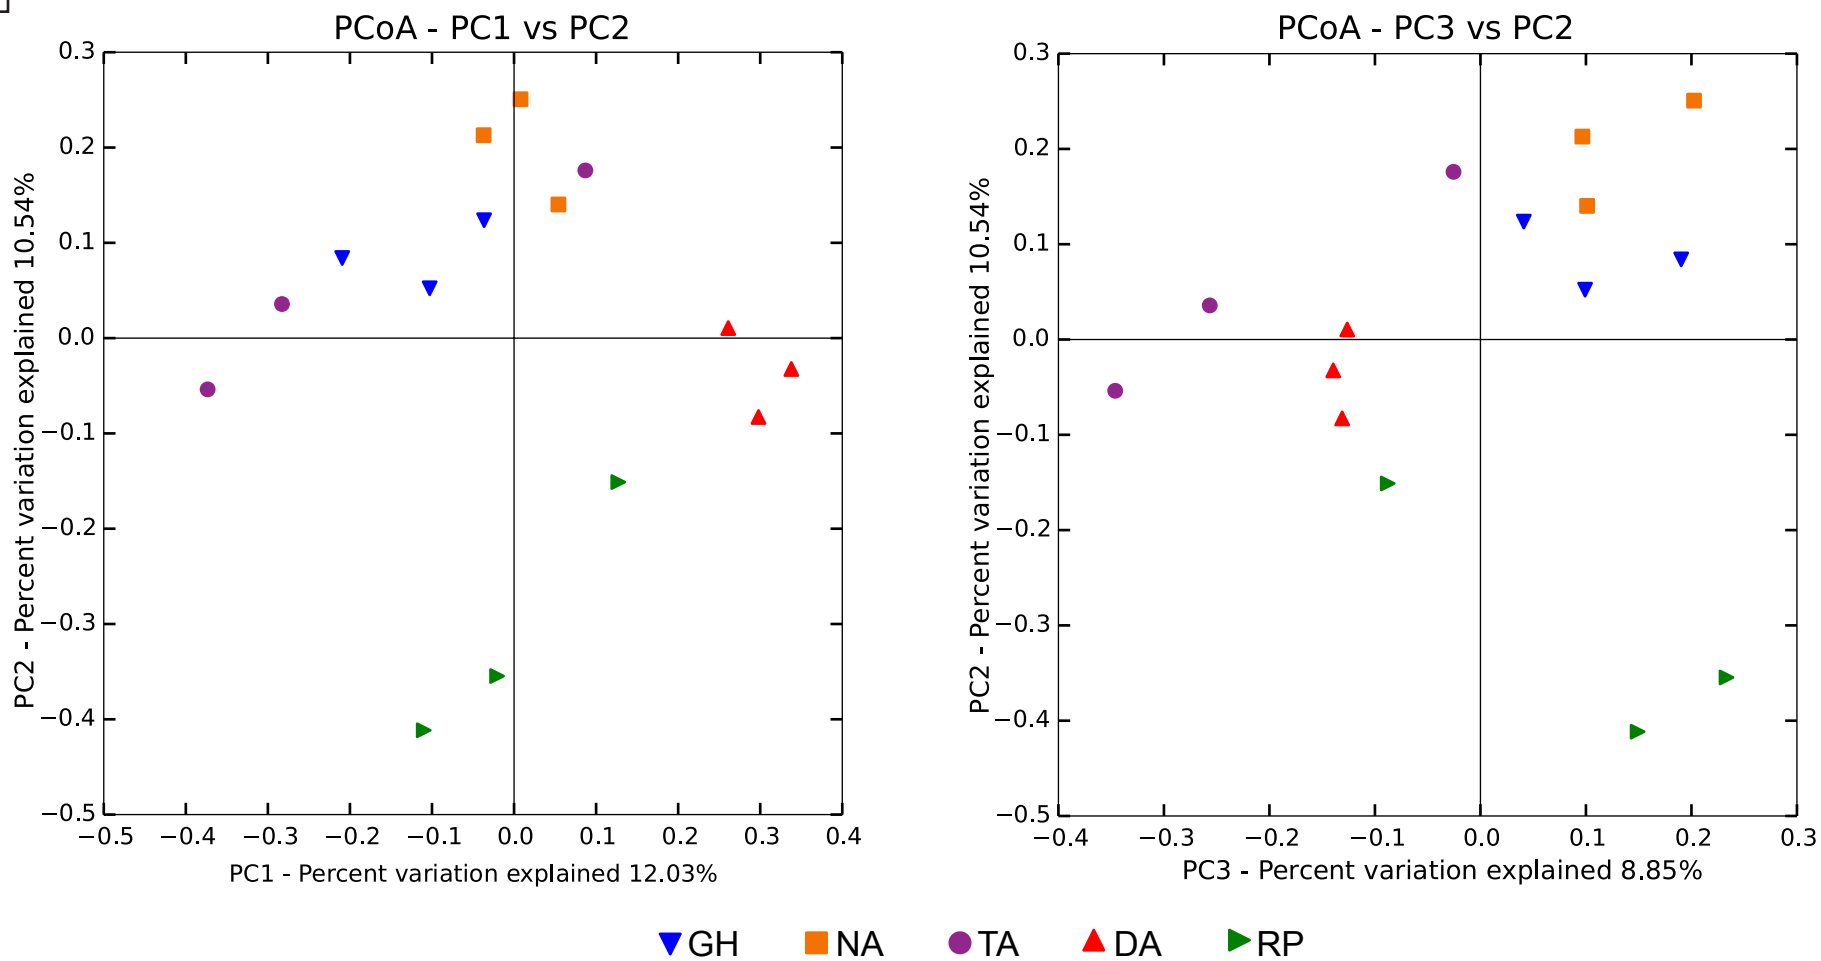

a

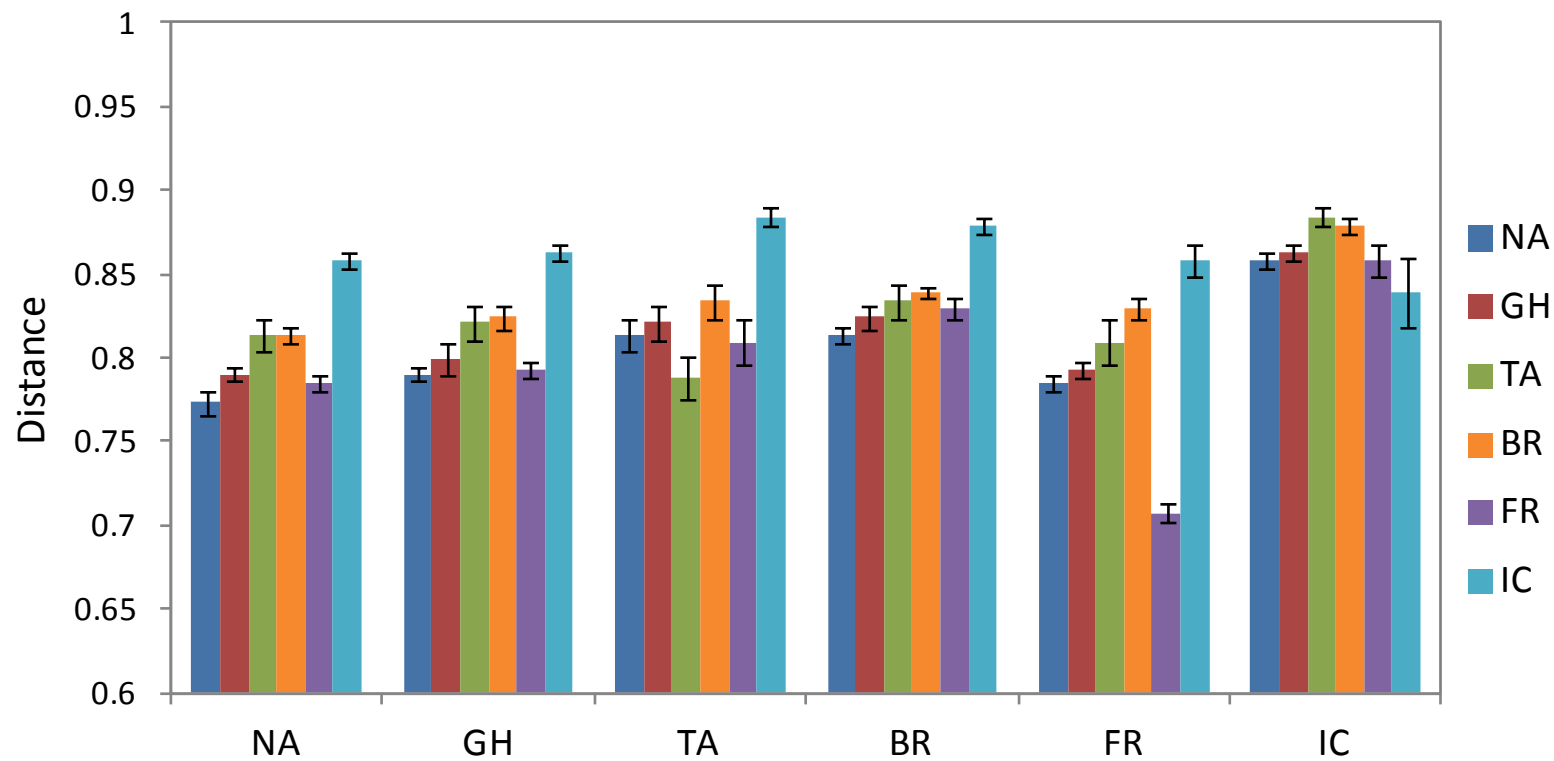

b

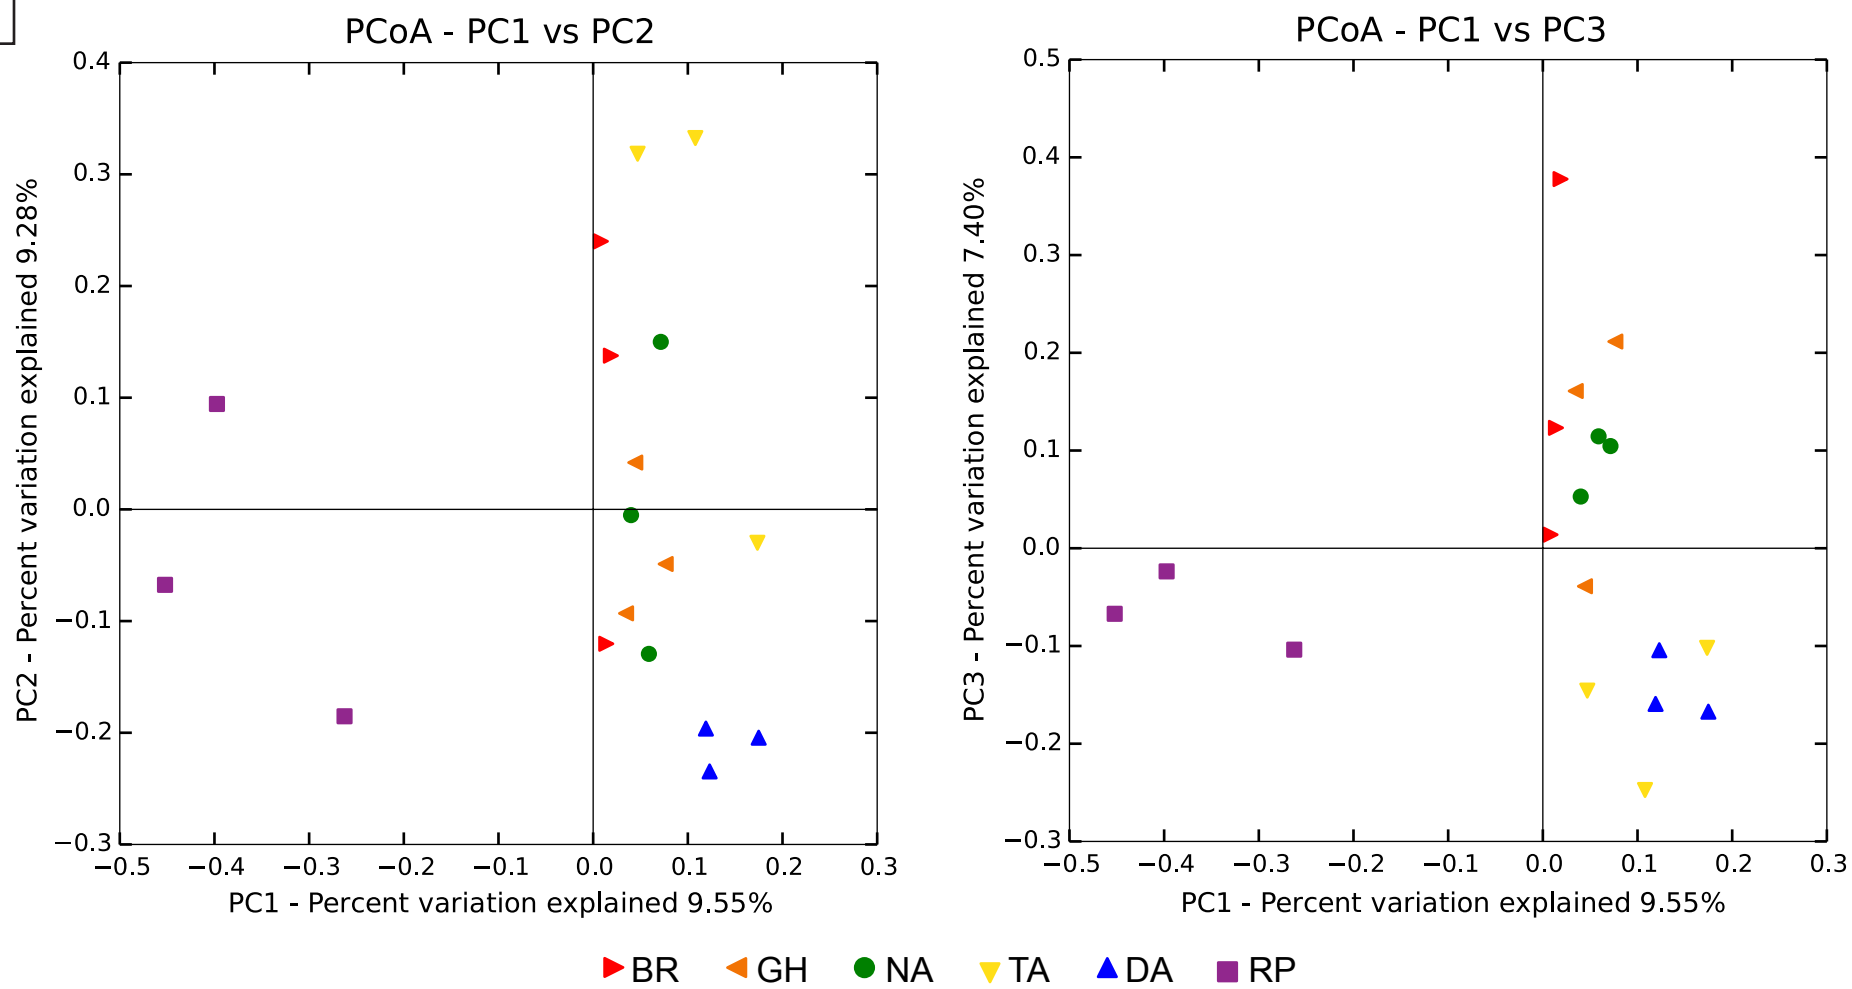

**a**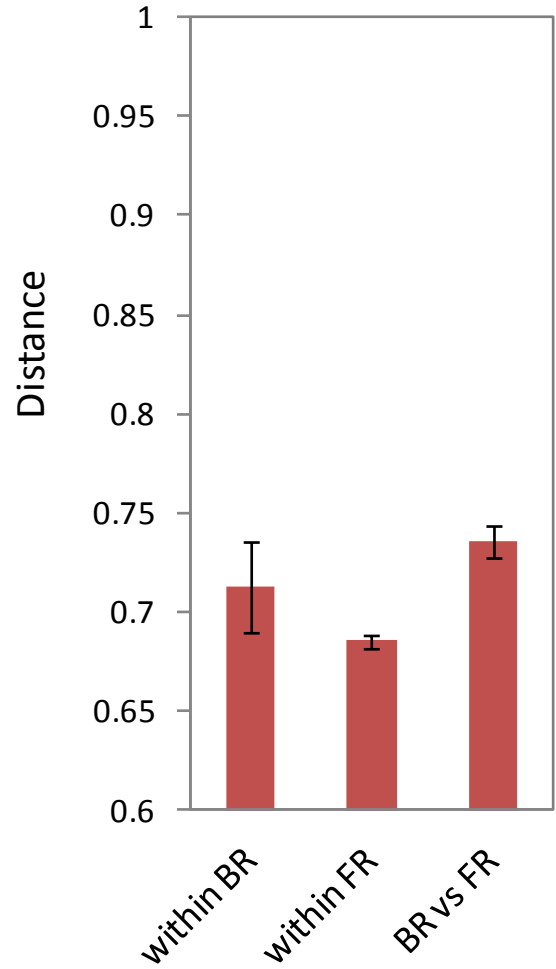**b**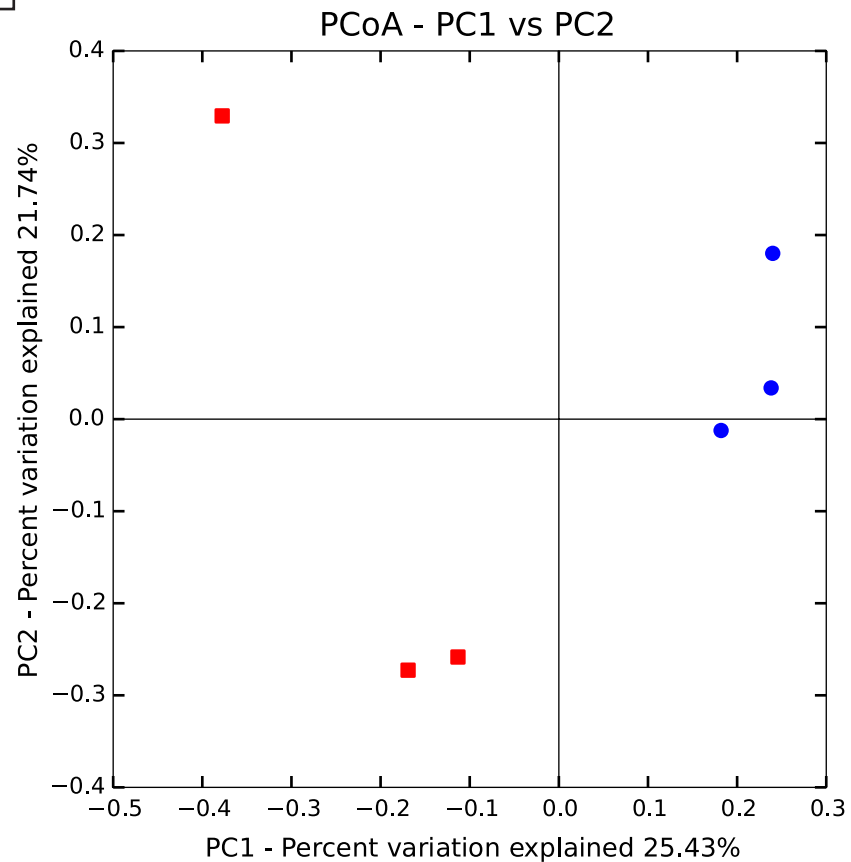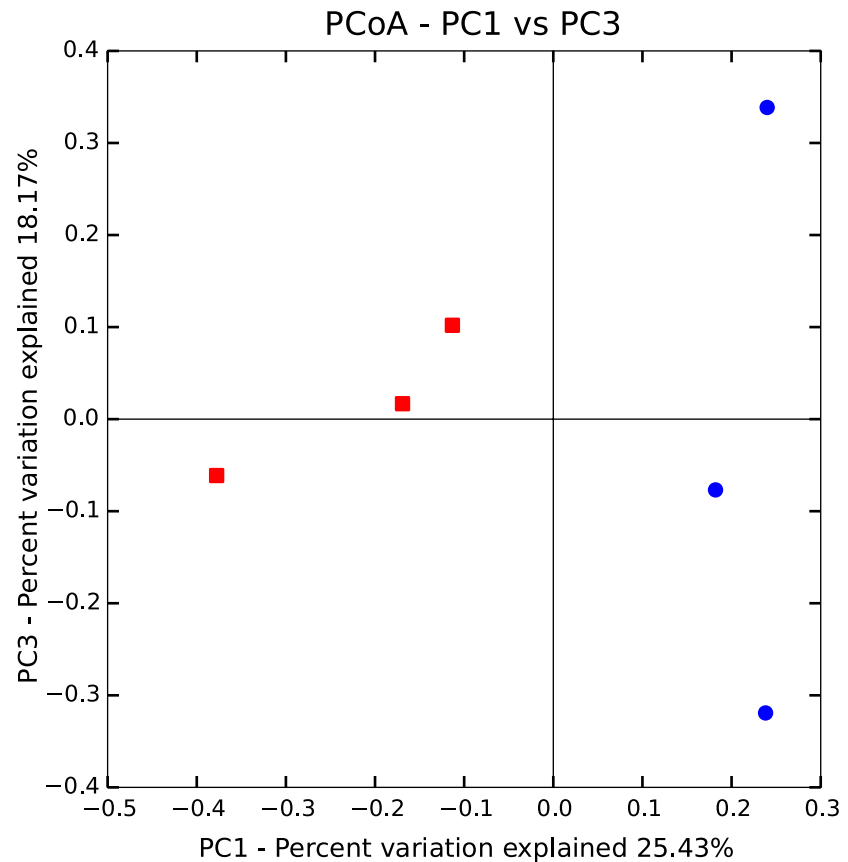

■ BR

● FR
